# Supplementary material for: Volumetric properties of some oligopeptides in aqueous solution: partial molar expansibilities and isothermal compressibilities at 298.15 K for the peptides of sequence Ala(gly)n, n = 1–4
Source: Royal Society of Chemistry journal article supplement (doi:10.1039/b003811n), 2000-01-01
Supplement: tables_1-12.doc [file tables_1-12.doc]

**Table S1** Densities and apparent molar volumes of aqueous solutions of alanylglycine at 291.15, 298.15, 303.15 and 313.15 K

| m/mol kg–1 | /g cm–3 | V/cm3 mol–1 | m/mol kg–1 | /g cm–3 | V/cm3 mol–1 |
| --- | --- | --- | --- | --- | --- |
| 291.15 K | | | | | |
| 0.15849  0.13882  0.12387  0.10556  0.08180 | 1.006742  1.005752  1.004994  1.004063  1.002847 | 94.05 (0.02)a  93.99 (0.02)  93.97 (0.02)  93.91 (0.03)  93.86 (0.04) | 0.07093  0.05495  0.03863  0.02659 | 1.002288  1.001461  1.000614  0.999991 | 93.83 (0.04)  93.82 (0.06)  93.80 (0.08)  93.66 (0.11) |
| 298.15 K | | | | | |
| 0.15530  0.13704  0.12287  0.10585  0.08684 | 1.004946  1.004028  1.003320  1.002465  1.001503 | 94.67 (0.02)  94.68 (0.02)  94.63 (0.03)  94.58 (0.03)  94.55 (0.04) | 0.07130  0.05477  0.03908  0.02951 | 1.000715  0.999873  0.999068  0.998574 | 94.49 (0.04)  94.41 (0.06)  94.37 (0.08)  94.39 (0.10) |
| 303.15 K | | | | | |
| 0.15664  0.13880  0.12277  0.10431  0.08680 | 1.003566  1.002675  1.001881  1.000957  1.000075 | 95.05 (0.02)  95.06 (0.02)  95.00 (0.03)  94.96 (0.03)  94.94 (0.04) | 0.07107  0.05492  0.03903  0.02601 | 0.999277  0.998465  0.997653  0.996987 | 94.96 (0.04)  94.82 (0.06)  94.83 (0.08)  94.81 (0.12) |
| 313.15 K | | | | | |
| 0.15778  0.14003  0.12337  0.10554  0.08730 | 1.000107  0.999236  0.998419  0.997537  0.996623 | 95.75 (0.02)  95.72 (0.02)  95.65 (0.03)  95.60 (0.03)  95.63 (0.04) | 0.07159  0.05280  0.03597  0.02306 | 0.995837  0.994893  0.994046  0.993392 | 95.62 (0.04)  95.59 (0.06)  95.53 (0.09)  95.51 (0.13) |

a Estimated uncertainties are in parentheses.

**Table S2** Densities and apparent molar volumes of aqueous solutions of alanylglycylglycine at 291.15, 303.15 and 313.15 K

| m/mol kg–1 | /g cm–3 | V/cm3 mol–1 | m/mol kg–1 | /g cm–3 | V/cm3 mol–1 |
| --- | --- | --- | --- | --- | --- |
| 291.15 K | | | | | |
| 0.14938  0.12427  0.11132  0.09956  0.08641 | 1.009381  1.007609  1.006689  1.005852  1.004907 | 129.69 (0.02)a  129.59 (0.02)  129.54 (0.03)  129.47 (0.03)  129.44 (0.04) | 0.07142  0.05860  0.04455  0.03225 | 1.003821  1.002893  1.001870  1.000971 | 129.45 (0.04)  129.42 (0.05)  129.39 (0.07)  129.37 (0.09) |
| 303.15 K | | | | | |
| 0.13646  0.12405  0.11334  0.09931  0.08617 | 1.005348  1.004483  1.003733  1.002753  1.001822 | 131.12 (0.02)  131.09 (0.03)  131.08 (0.03)  131.00 (0.03)  131.02 (0.04) | 0.07183  0.05783  0.04766  0.03281 | 1.000813  0.999817  0.999089  0.998022 | 130.90 (0.04)  130.85 (0.05)  130.85 (0.06)  130.84 (0.09) |
| 313.15 K | | | | | |
| 0.14457  0.13126  0.12318  0.11129  0.10161 | 1.002368  1.001455  1.000898  1.000079  0.999410 | 132.14 (0.02)  132.09 (0.02)  132.07 (0.03)  132.01 (0.03)  131.95 (0.03) | 0.08676  0.05924  0.04547  0.02953 | 0.998372  0.996439  0.995466  0.994338 | 131.94 (0.04)  131.87 (0.05)  131.83 (0.07)  131.63 (0.10) |

a Estimated uncertainties are in parentheses.

**Table S3** Densities and apparent molar volumes of aqueous solutions of alanylglycylglycylglycine at 291.15, 303.15 and 313.15 K

| m/mol kg–1 | /g cm–3 | V/cm3 mol–1 | m/mol kg–1 | /g cm–3 | V/cm3 mol–1 |
| --- | --- | --- | --- | --- | --- |
| 291.15 K | | | | | |
| 0.05860  0.05317  0.04901  0.04398  0.03995 | 1.004089  1.003585  1.003205  1.002733  1.002358 | 165.72 (0.05)a  165.71 (0.06)  165.56 (0.06)  165.62 (0.07)  165.59 (0.08) | 0.03514  0.03163  0.02676  0.02213 | 1.001913  1.001584  1.001124  1.000688 | 165.43 (0.09)  165.42 (0.10)  165.49 (0.11)  165.51 (0.14) |
| 303.15 K | | | | | |
| 0.05788  0.05295  0.04779  0.04363  0.03948 | 1.000982  1.000532  1.000060  0.999684  0.999299 | 167.56 (0.05)  167.56 (0.06)  167.56 (0.06)  167.45 (0.07)  167.53 (0.08) | 0.03502  0.03061  0.02592  0.02096 | 0.998892  0.998486  0.998051  0.997597 | 167.47 (0.09)  167.46 (0.10)  167.52 (0.12)  167.35 (0.15) |
| 313.15 K | | | | | |
| 0.05766  0.05346  0.04902  0.04389  0.03893  0.03448 | 0.997461  0.997086  0.996681  0.996221  0.995773  0.995371 | 169.06 (0.05)  168.99 (0.06)  169.08 (0.06)  169.00 (0.07)  168.96 (0.08)  168.89 (0.09) | 0.03279  0.03109  0.02647  0.02316  0.02100 | 0.995215  0.995067  0.994642  0.994345  0.994144 | 168.96 (0.09) 168.77 (0.10)  168.90 (0.12)  168.67 (0.13)  168.83 (0.15) |

a Estimated uncertainties are in parentheses.

**Table S4** Densities and apparent molar volumes of aqueous solutions of alanylglycylglycylglycylglycine at 291.15, 303.15 and 313.15 K

| m/mol kg–1 | /g cm–3 | V/cm3 mol–1 | m/mol kg–1 | /g cm–3 | V/cm3 mol–1 |
| --- | --- | --- | --- | --- | --- |
| 291.15 K | | | | | |
| 0.04094  0.03898  0.03790  0.03477  0.03398  0.03188 | 1.003310  1.003084  1.002960  1.002600  1.002517  1.002272 | 201.36 (0.07)a  201.40 (0.08)  201.42 (0.08)  201.49 (0.09)  201.28 (0.09)  201.39 (0.10) | 0.02843  0.02546  0.02294  0.02000  0.01744 | 1.001875  1.001539  1.001249  1.000910  1.000617 | 201.47 (0.11)  201.29 (0.12)  201.29 (0.13)  201.27 (0.15)  201.19 (0.17) |
| 303.15 K | | | | | |
| 0.04094  0.03790  0.03477  0.03398  0.02994 | 1.000275  0.999931  0.999581  0.999494  0.999041 | 203.79 (0.07)  203.86 (0.08)  203.83 (0.09)  203.79 (0.09)  203.74 (0.10) | 0.02546  0.02294  0.02000  0.01744 | 0.998537  0.998254  0.997920  0.997632 | 203.72 (0.12)  203.66 (0.13)  203.70 (0.15)  203.64 (0.17) |
| 313.15 K | | | | | |
| 0.04143  0.03793  0.03480  0.03205  0.03008 | 0.996839  0.996453  0.996109  0.995802  0.995582 | 205.55 (0.07)  205.54 (0.08)  205.43 (0.09)  205.49 (0.10)  205.53 (0.10) | 0.02793  0.02495  0.02100  0.01897  0.01503 | 0.995347  0.995014  0.994572  0.994345  0.993906 | 205.40 (0.11)  205.44 (0.12)  205.49 (0.15)  205.50 (0.16)  205.43 (0.20) |

a Estimated uncertainties are in parentheses.

**Table S5** Densities and apparent molar volumes of aqueous solutions of tetraglycine at 291.15, 303.15 and 313.15 K

| m/mol kg–1 | /g cm–3 | V/cm3 mol–1 | m/mol kg–1 | /g cm–3 | V/cm3 mol–1 |
| --- | --- | --- | --- | --- | --- |
| 291.15 K | | | | | |
| 0.011992  0.010980  0.010476 | 0.999777  0.999679  0.999627 | 147.74 (0.25)a  147.59 (0.28)  147.79 (0.29) | 0.009785  0.009122 | 0.999561  0.999495 | 147.68 (0.31)  147.71 (0.33) |
| 303.15 K | | | | | |
| 0.011992  0.010980  0.010476 | 0.996805  0.996712  0.996660 | 149.96 (0.25)  149.57 (0.28)  149.89 (0.29) | 0.009785  0.009122 | 0.996595  0.996532 | 149.73 (0.31)  149.62 (0.33) |
| 313.15 K | | | | | |
| 0.011991  0.011793  0.011477  0.010998  0.010482 | 0.993365  0.993345  0.993312  0.993269  0.993220 | 150.90 (0.25)  151.00 (0.26)  151.25 (0.27)  151.02 (0.28)  151.00 (0.29) | 0.010253  0.009827  0.009492  0.009082 | 0.993199  0.993159  0.993125  0.993088 | 150.92 (0.30)  150.85 (0.31)  151.06 (0.32)  150.83 (0.34) |

a Estimated uncertainties are in parentheses.

**Table S6** Densities and apparent molar volumes of aqueous solutions of pentaglycine at 291.15, 298.15, 313.15 and 328.15 K

| m/mol kg–1 | /g cm–3 | V/cm3 mol–1 | m/mol kg–1 | /g cm–3 | V/cm3 mol–1 |
| --- | --- | --- | --- | --- | --- |
| 291.15 K | | | | | |
| 0.003301  0.003207  0.003098 | 0.998989  0.998979  0.998964 | 184.5 (0.9)a  184.2 (0.9)  184.8 (1.0) | 0.003002  0.002913  0.002799 | 0.998952  0.998943  0.998929 | 185.1 (1.0)a  184.5 (1.0)  184.7 (1.1) |
| 298.15 K | | | | | |
| 0.003301  0.003207  0.003098 | 0.997433  0.997422  0.997408 | 186.5 (0.9)  186.5 (0.9)  186.9 (1.0) | 0.003002  0.002913  0.002799 | 0.997396  0.997389  0.997376 | 187.2 (1.0)  186.0 (1.0)  185.9 (1.1) |
| 313.15 K | | | | | |
| 0.003300  0.003182  0.003096 | 0.992598  0.992586  0.992574 | 188.9 (0.9)  188.4 (1.0)  189.1 (1.0) | 0.002999  0.002886  0.002645 | 0.992564  0.992550  0.992524 | 188.7 (1.0)  189.1 (1.1)  188.5 (1.2) |
| 328.15 K | | | | | |
| 0.003300  0.003182  0.003096 | 0.986068  0.986057  0.986044 | 191.6 (0.9)  190.8 (1.0)  191.9 (1.0) | 0.002999  0.002886  0.002645 | 0.986039  0.986022  0.985997 | 189.9 (1.0)  191.4 (1.1)  190.5 (1.2) |

a Estimated uncertainties are in parentheses.

**Table S7** Sound speeds and apparent molar isentropic compressibilities of the peptides ala(gly)3 and ala(gly)4 at 298.15 K

| m/mol kg–1 | u/m s–1 | –1015 Ks, /m3 mol–1 Pa–1 | m/mol kg–1 | u/m s–1 | –1015 Ks, /m3 mol–1 Pa–1 |
| --- | --- | --- | --- | --- | --- |
| ala(gly)3 | | | | | |
| 0.04659  0.04361  0.03891  0.03629  0.03387  0.03070 | 1502.392  1502.036  1501.456  1501.138  1500.852  1500.455 | 40.39 (0.06)a  40.55 (0.07)  40.58 (0.08)  40.67 (0.08)  40.89 (0.09)  40.81 (0.10) | 0.02650  0.02300  0.02005  0.01750  0.01397 | 1499.948  1499.514  1499.157  1498.844  1498.409 | 41.07 (0.11)  41.02 (0.13)  41.23 (0.15)  41.32 (0.17)  41.40 (0.21) |
| ala(gly)4 | | | | | |
| 0.03990  0.03711  0.03443  0.03105  0.02793 | 1502.229  1501.845  1501.471  1501.002  1500.577 | 43.61 (0.08)  43.71 (0.08)  43.75 (0.09)  43.82 (0.10)  44.06 (0.11) | 0.02476  0.02187  0.01899  0.01722 | 1500.126  1499.730  1499.330  1499.080 | 43.90 (0.12)  44.09 (0.14)  44.17 (0.16)  44.12 (0.17) |

a Estimated uncertainties are in parentheses.

**Table 7** Partial molar volumes at infinite dilution and the SV values for the ala(gly)n peptides, tetraglycine and pentaglycine in aqueous solution at various temperatures

| T/K | /cm3 mol–1 | SV/cm3 kg mol–2 |
| --- | --- | --- |
| alagly | | |
| 291.15  298.15  303.15  313.15 | 93.66 (0.02)a  94.32 (0.03)  94.78 (0.03)  95.46 (0.04) | 2.4 (0.1)a  2.4 (0.3)  1.9 (0.3)  1.8 (0.3) |
| ala(gly)2 | | |
| 291.15  298.15  303.15  313.15 | 129.20 (0.04)  130.16 (0.01)b  130.71 (0.04)  131.63 (0.04) | 3.2 (0.3)  2.29 (0.08)  3.1 (0.3)  3.5 (0.3) |
| ala(gly)3 | | |
| 291.15  298.15  303.15  313.15 | 165.21 (0.09)  166.62 (0.06)c  167.35 (0.06)  168.65 (0.08) | 8.6 (1.8)  9.6 (1.4)c  3.8 (1.3)  7.4 (1.7) |
| ala(gly)4 | | |
| 291.15  298.15  303.15  313.15 | 201.2 (0.1)  202.59 (0.08)c  203.53 (0.07)  205.35 (0.07) | 5.3 (3.5)  11.6 (2.3)c  7.5 (2.0)  4.3 (2.2) |
| (gly)4 | | |
| 291.15  298.15  303.15  313.15 | 147.7 (0.1)  149.0 (0.2)c  149.8 (0.2)  151.0 (0.2) | -  -  -  - |
| (gly)5 | | |
| 291.15  298.15  313.15  328.15 | 184.6 (0.3)  186.5 (0.5)  188.8 (0.3)  191.0 (0.8) | -  -  -  - |

a Standard errors are in parentheses. b Ref. 18. c Ref. 15.

**Table 8** Coefficients of Eqn. (3)

| peptide | a/cm3 mol–1 | b/cm3 K–1 mol–1 | 103c/cm3 K–2 mol–1 | /K |
| --- | --- | --- | --- | --- |
| alagly  ala(gly)2  ala(gly)3  ala(gly)4  (gly)4  (gly)5 | 94.68 (0.02)b  130.63 (0.01)  167.24 (0.05)  203.347 (0.006)  149.646 (0.007)  188.3 (0.2) | 0.0822 (0.0016)b  0.1099 (0.0016)  0.1546 (0.0052)  0.1885 (0.0006)  0.1501 (0.0005)  0.167 (0.02) | –1.00 (0.2)b  –1.73 (0.2)  –2.46 (0.7)  –0.583 (0.08)  –2.45 (0.07)  –1.63 (1.2) | 302.15  302.15  302.15  302.15  302.15  309.65 |

a Mid-point of the temperature range. bStandard deviations are in parentheses.

**Table 10** Partial molar expansibilities, heat capacities and compressibilities at infinite dilution of some oligopeptides at 298.15 K

| solute | /cm3 mol–1 K–1 | /J K–1 mol–1 | –1015/m3 mol–1 Pa–1 | –1015/m3 mol–1 Pa–1 |
| --- | --- | --- | --- | --- |
| ala  alagly  ala(gly)2  ala(gly)3  ala(gly)4  gly  glygly  (gly)3  (gly)4  (gly)5 | 0.0735 (0.004)a, b  0.0909 (0.002)  0.1237 (0.002)  0.1705 (0.006)  0.1932 (0.0006)  0.0651 (0.0009)j  0.0960 (0.003)k  0.1555 (0.003)l  0.1697 (0.0005)  0.204 (0.03) | 141.2 (0.6)c  203.4 (0.5)e  286.2 (0.4)g  372.1 (2.5)i  455.7 (2.1)i  37.6 (0.7)c  100.8 (0.3)e  188.3 (0.7)g  271 (5)i  366 (13)n | 25.0 (0.1)d  34.2 (0.1)f  39.1 (0.1)h  41.80 (0.09)  44.6 (0.1)  27.0 (0.4)d  40.2 (0.1)f  44.9 (0.1)h  45.9 (0.7)m  47.2 (1.4)m | 22.5 (0.2)  31.1 (0.2)  34.9 (0.1)  35.9 (0.4)  38.0 (0.1)  24.7 (0.4)  36.8 (0.2)  39.4 (0.2)  40.0 (0.7)  40.1 (1.8) |

a Standard errors are in parentheses. b Derived using data from ref. 32. See text. c Ref. 32. dRef. 33. e Ref. 19. f Ref. 16. g Ref. 18. h Ref. 17. i Ref. 15. j Derived using data from ref. 32. k Derived using data combined from refs. 34–36. l Derived using data from ref. 37. mRef. 14. n Mean and standard deviation of Cp,  data deposited as unpublished data, ref. 31. See ref. 15.

**Table 11** Comparison with literature data of the partial molar expansibilities of some amino acids and peptides in aqueous solution at 298.15 K

|  | /cm3 mol–1 K–1 | |
| --- | --- | --- |
| Solute | this work | literature |
| ala  gly  (gly)2  (gly)3  (gly)4  (gly)5 | 0.0735 (0.004)a  0.0651 (0.0009)  0.0960 (0.003)  0.1555 (0.003)  0.1697 (0.0005)  0.204 (0.03) | 0.063 (0.005)b, 0.088 (0.01)c, 0.051 (0.003)d,  0.068 (0.003)e  0.067 (0.003)b, 0.10 (0.01)c, 0.069 (0.009)d,  0.068 (0.01)f, 0.074 (0.001)e  0.093 (0.001)g, 0.103 (0.003)c, 0.115 (0.02)f  0.166 (0.02)f, 0.139 (0.002)c  0.281 (0.03)f  0.395 (0.04)f |

a Standard errors are in parentheses. b Ref. 38. c Ref. 39. dDerived using apparent molar volume data in the concentration range 1–3 mg mL–1, ref. 40. e Ref. 41. f Ref. 14. g Ref. 36.

**Table 12** Partial molar isentropic compressibility of the glycyl group in aqueous solution at 298.15 K

| data used |  |
| --- | --- |
| peptides ala(gly)n, n = 2–4  peptides (gly)m, m = 3–5  AcglyglyNH2 and AcglyNH2d  (gly)4 and (gly)3  j  cyclo(glygly)d | –2.75 (0.03)a, b  –1.08 (0.08)b, –1.1 (0.5)c  –3.14 (0.05)e, –3.54 (0.05)f, –3.94 (0.12)g  –8.8 (2.5)h, –8.4 (0.4)i  –4.4j  –5.6 (0.1)k |

a Estimated uncertainties are in parentheses. b This work. c Ref. 14. d Abbreviations used: AcglyglyNH2 = N-acetylglycylglycinamide; AcglyNH2 = N-acetyglycinamide; cyclo(glygly) =

2, 5-piperazinedione. e data from ref. 45. f (AcglyNH2) value derived using new density data from ref. 15. g (AcglyNH2) value from ref. 46. h data from ref. 47. i data from ref. 48. j S. Ya. Nikitin, PhD thesis, see supporting information in ref. 3. The method used to obtain the result is unclear. k Half the value for cyclo(glygly), from ref. 39.
